# Supplementary material for: Operation Stability Analysis of Basic Acupuncture Manipulation Based on Three‐Dimensional Motion Tracking Data
Source: Hindawi journal article supplement (doi:10.1155/2022/1958984), 2022-01-01
Supplement: f1 [file 1958984.f1.docx]

**Supplemental File of “Operation Stability Analysis of Basic Acupuncture Manipulation based on Three-dimensional Motion Tracking Data”**

**Video 1**


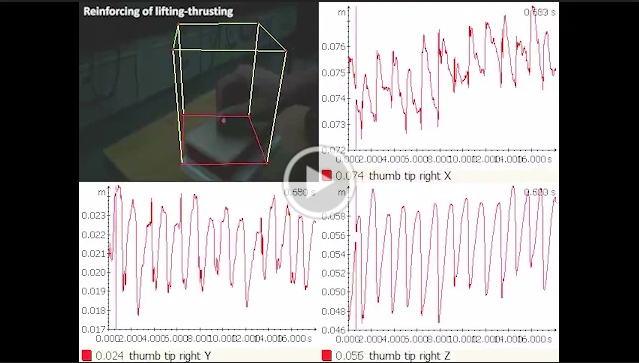


**Download links:**

Mirror 1 (Google Drive): <https://drive.google.com/file/d/1YXErFqHwuvg0D2Nv-fEdvht7VYBuc_Au/view>

Mirror 2 (Baidu Drive): <https://pan.baidu.com/s/1xeteNHNhVg90dQiOZ39TZQ?pwd=qrhi>

Mirror 3 (Aliyun Drive): <https://www.aliyundrive.com/s/ppD78FemSRk>

**Video 2**


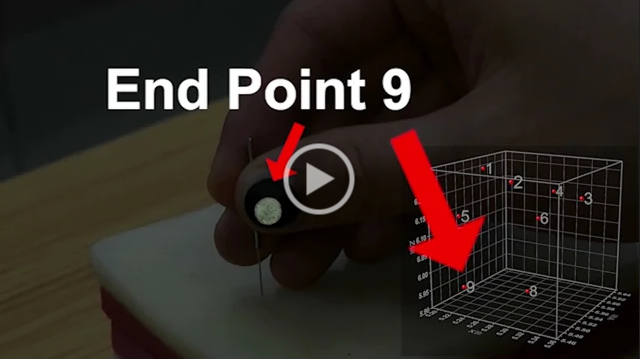


**Download links:**

Mirror 1 (Google Drive): <https://drive.google.com/file/d/1KfK6FQU-yEyr7jArG-g3Dk1ER3OX0WBg/view>

Mirror 2 (Baidu Drive): <https://pan.baidu.com/s/1bHN8fGLOCEalX6SQvS98cg?pwd=eidq>

Mirror 3 (Aliyun Drive): <https://www.aliyundrive.com/s/BqpmiYwrshS>
